# Supplementary material for: Garcinol Promotes the Formation of Slow-Twitch Muscle Fibers by Inhibiting p300-Dependent Acetylation of PGC-1α
Source: MDPI journal article supplement (doi:10.3390/ijms24032702), 2023-01-31

# Garcinol Promotes the Formation of Slow-Twitch Muscle Fibers by Inhibiting p300-Dependent Acetylation of PGC-1 $\alpha$

## Online Supplementary Material

### Supplemental Table S1

#### Ingredient and chemical composition of the diets

| Item                            |       |
|---------------------------------|-------|
| Ingredient, %                   |       |
| Corn                            | 67.0  |
| Soybean meal, dehulled          | 14.0  |
| Wheat bran                      | 15.6  |
| Fish meal                       | 0.5   |
| Soybean oil                     | -     |
| Dicalcium phosphate             | 1.2   |
| Limestone                       | 0.8   |
| L-Lysine HCl (78%)              | -     |
| Salt                            | 0.38  |
| Premix <sup>1</sup>             | 0.52  |
| Total                           | 100   |
| Calculated composition          |       |
| Gross energy, GE, MJ/kg         | 14.21 |
| Crude protein, CP, %            | 21.7  |
| Fat, %                          | 9.4   |
| Ca, %                           | 0.95  |
| Total P, %                      | 0.61  |
| Analyzed composition            |       |
| Metabolizable energy, ME, MJ/kg | 12.04 |
| Crude protein, CP, %            | 20.5  |
| Fat, %                          | 7.6   |
| Ash, %                          | 5.4   |
| Ether extract, EE, %            | 1.7   |

<sup>1</sup>Premix supplied the following per kilogram of diet: 1) cobalt (as cyanocobalamin), 0.6; 2) copper (as CuSO<sub>4</sub> · 5H<sub>2</sub>O), 5.0; 3) iodine (as CaI<sub>2</sub>), 0.48; 4) iron (as FeSO<sub>4</sub>), 75.0; 5) manganese (as MnO), 20.0; 6) selenium (as Na<sub>2</sub>SeO<sub>3</sub>), 0.40; and 7) zinc (as ZnO), 10.0; 8) all-rac- $\alpha$ -tocopheryl acetate, 64.0; 9) D-biotin, 0.2; 10) calcium

d-pantothenate, 24.0; 11) cholecalciferol, 5.5; 12) folic acid, 6.0; 13) menadione sodium bisulfite, 2.2; 14) nicotinic acid, 30.3; 15) pyridoxine-HCl, 12.0; 16) retinyl acetate, 1.9; 17) riboflavin, 5.5; 18) thiamin-HCl, 13.0; and 19) vitamin B-12, 0.022.

**Supplemental Table S2** Name, type, dilution, and source of primary antibodies<sup>1</sup>

| Antibody              | Isotype          | Dilution | Source                                      |
|-----------------------|------------------|----------|---------------------------------------------|
| p300                  | Rabbit           | 1:1000   | Cell Signaling Technology (Boston, MA, USA) |
| PGC-1 $\alpha$        | Rabbit           | 1:2000   | Cell Signaling Technology (Boston, MA, USA) |
| Sirt1                 | Rabbit           | 1:2000   | Cell Signaling Technology (Boston, MA, USA) |
| Slow MyHC             | Rabbit           | 1:1000   | Abcam (Cambridge, MA, USA)                  |
| Fast MyHC             | Rabbit           | 1:1000   | Abcam (Cambridge, MA, USA)                  |
| ACTB                  | Rabbit           | 1:2000   | Cell Signaling Technology (Boston, MA, USA) |
| Secondary Antibody    |                  |          |                                             |
| HRP labelled Antibody | Goat anti rabbit | 1:10,000 | Santa Cruz (Santa Cruz, CA, USA)            |

<sup>1</sup>PGC-1 $\alpha$ , peroxisome proliferator-activated receptor- $\gamma$  coactivator-1 $\alpha$ ; Sirt1, Silent information regulator 1; Slow MyHC, slow myosin heavy chain; Fast MyHC, fast myosin heavy chain; ACTB,  $\beta$ -Actin.

**Supplemental Table S3 Primers used for real-time quantitative PCR<sup>1</sup>**

| Gene      | Primer sequence (5'–3')                              | Length, bp |
|-----------|------------------------------------------------------|------------|
| MyHCI     | F:AAGGGCTTGAACGAGGAGTAGA<br>R:TTATTCTGCTTCCTCCAAAGGG | 115        |
| MyHCIIa   | F: GCTGAGCGAGCTGAAATCC<br>R: ACTGAGACACCAGAGCTTCT    | 137        |
| MyHCIIx   | F: AGAAGATCAACTGAGTGAAC<br>R: AGAGCTGAGAACTAACGTG    | 149        |
| MyHCIIb   | F: ATGAAGAGGAACCACATTA<br>R: TTATTGCCTCAGTAGCTTG     | 166        |
| Myoglobin | F: CACCATGGGGCTCAGTGATG<br>R:CTCAGCCCTGGAAGCCTAGC    | 143        |
| TnI slow  | F: AGTTGAGAGGAAATCCAAGAT<br>R:CTTCAGCTTCAGGTCCTTGAT  | 125        |
| TnI fast  | F:TCAAGGATAAGGGCGACAGC<br>R:TGTCCATGGACGCAGCTCTT     | 126        |
| 18srRNA   | F:CCCACGGAATCGAGAAAGAG<br>R:TTGACGGAAGGGCACCA        | 122        |

<sup>1</sup>MyHCI, Myosin heavy chain I; MyHCIIa, Myosin heavy chain IIa; MyHCIIx, Myosin heavy chain IIx; MyHCIIb, Myosin heavy chain IIb; TnI slow, Troponin I slow; TnI fast, Troponin I fast.

F: forward primer; R: reverse primer

## Online Supplementary Material

Figure S1. Dose-response curves for C2C12 myotubes to garcinol

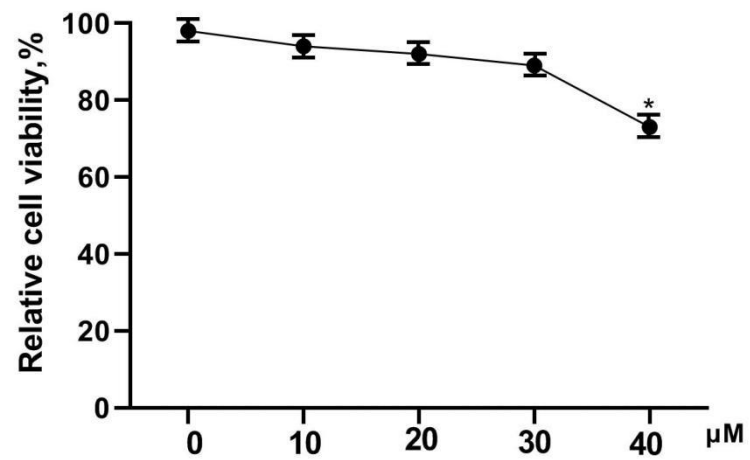

Figure S2. Time-response curve of C2C12 myotubes to garcinol

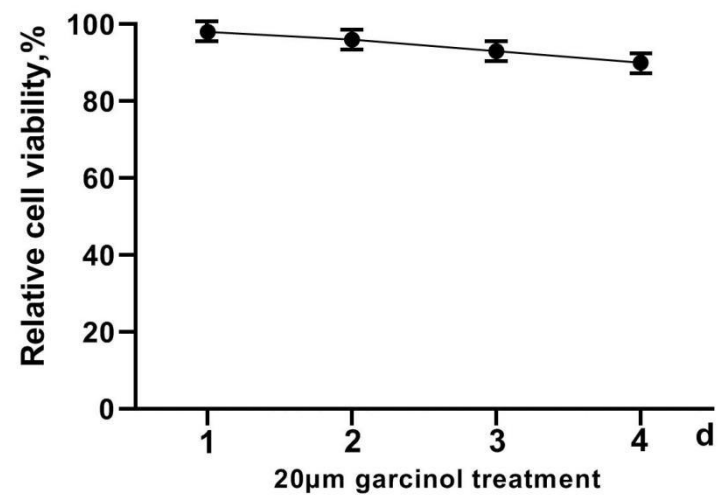

Supplement: s1 [file s1]
